# Supplementary material for: Antimicrobial nitric oxide releasing gelatin nanoparticles to combat drug resistant bacterial and fungal infections
Source: Royal Society of Chemistry journal article supplement (doi:10.1039/d4na01042f), 2025-01-01
Supplement: d4na01042f1.pdf [file d4na01042f1.pdf]

## Supporting Information

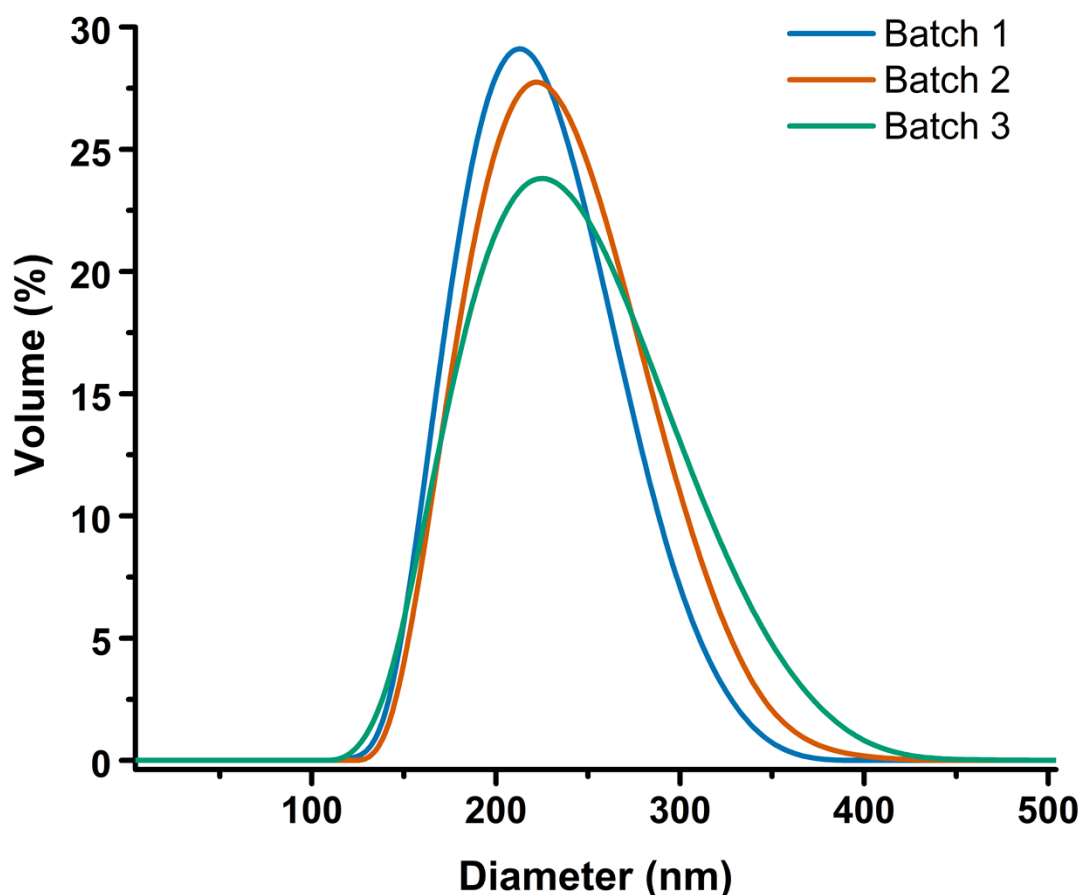

*Supporting Figure 1. Interbatch variability of three batches of GNP synthesised under the same parameters. The total volume of particles (volume %) within various size distributions for three batches of GNP synthesised under normal conditions. Batch 1 (blue), Batch 2 (red) and Batch 3 (green).*

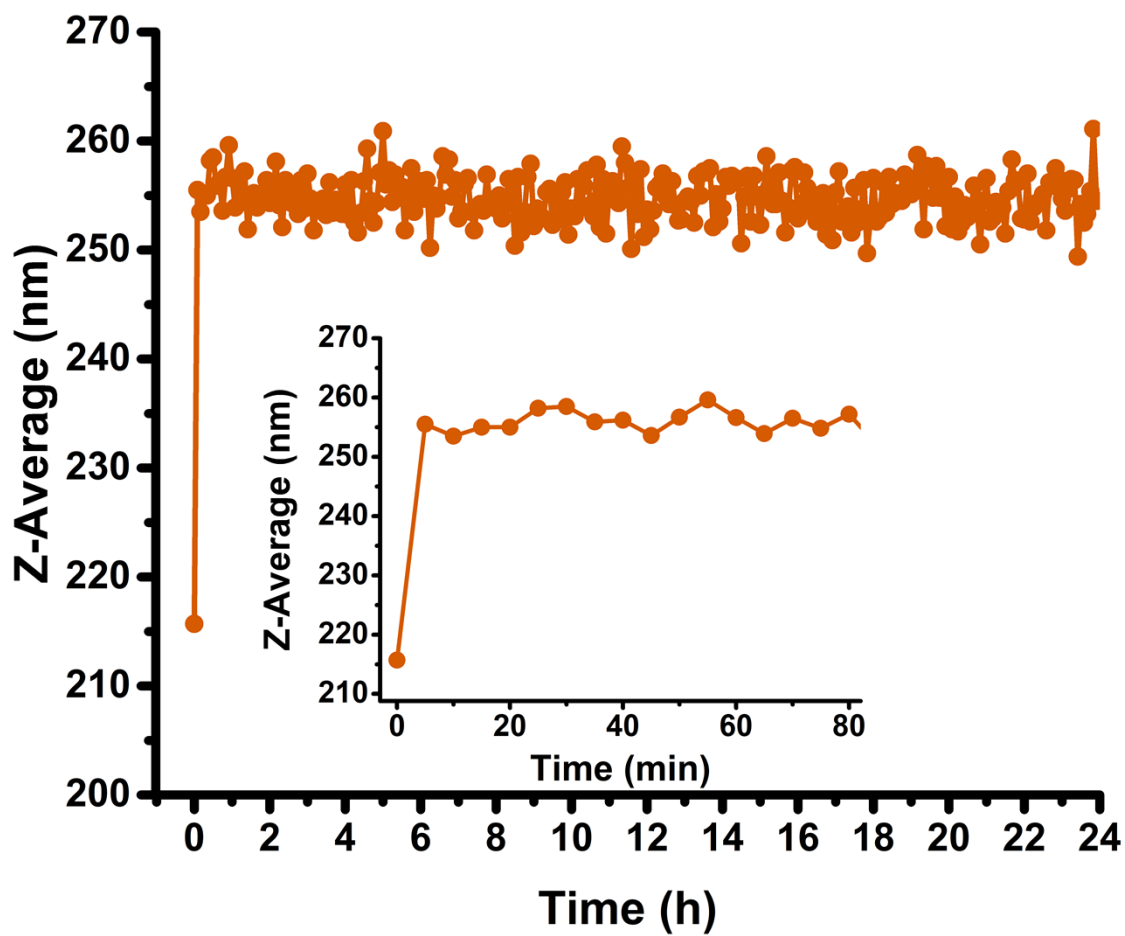

Supporting Figure 2. Swelling analysis of GNP over time measured by DLS (Z-average). The effects of water on particles diameter are shown for both pre (blue) and post (red) lyophilised particles.
